# Supplementary material
Source: publisher figshare collection journal article supplement (https://diabetesjournals.figshare.com/articles/dataset/_/12860438)
Supplement: Supplementary file 2 [file 1]

# SUPPLEMENTARY FIGURE 1

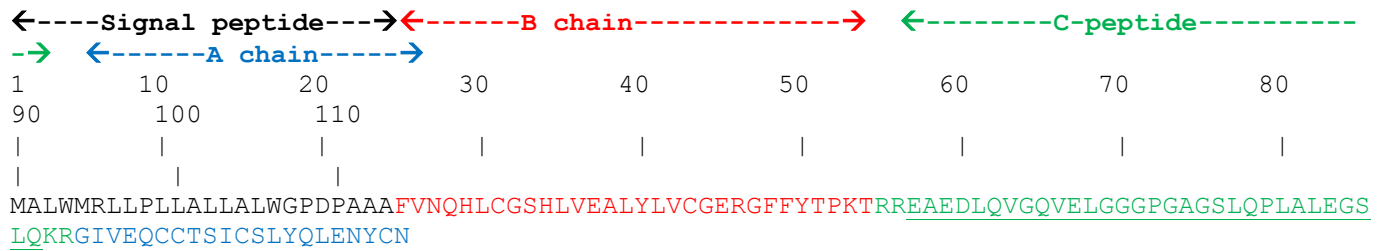

**LALWGPDPA (10) \*** **HLCGSHLVEAL (1.9) \*\*** **DLQVGQVELGG (64) \*\***  
**LVEALYLVCGE (5.8) \*\***

MALWMRLLPLLLALLALWGPD (~0.8) \*\*\*

PLLALLALWGPDPAALFVNQ (~1.8) \*\*\*

LWGPDPAALFVNQHLGSHLV (~12.4) \*\*\*

FVNQHLGSHLVEALYLVCGERG (~0.2) \*\*\*

SHLVEALYLVCGERGFFYTP (~0.4) \*\*\*

LVCGERGFFYTPKTRREA (~4.9) \*\*\*

ALEGSLQKRGIVEQCCTSICS (~1.5) \*\*\*

GIVEQCCTSICSLYQLENY (~0.34) \*\*\*

IVEQCCTSICSLYQLENYCN (~0.37) \*\*\*

## Supplementary Figure 1. Analysis of DQ602-bound preproinsulin epitopes as reported in three different studies

\*This peptide and three others with the next one, two or seven residues on its carboxy-terminus side were eluted from preproinsulin loaded onto HLA-DQ602-expressing homozygous dendritic cells (53). In parenthesis is the IC50 value for binding to HLA-DQ602 in  $\mu\text{M}$  (53).

\*\*In parentheses, IC50 values in  $\mu\text{M}$  as reported for the respective 11-mers by (30). Anchors in bold; nd = not determined

\*\*\*Binding values in  $\mu\text{M}$ , as determined for the 20-mer sequences shown (55), and reported graphically by the authors; estimated approximately (~) by us, rounded to first decimal point, if the error was less than 5 %. No experiments to determine the exact binding register of these peptides were reported. Peptides with IC50 values over 20  $\mu\text{M}$  (in the middle of the C-peptide sequence) are not shown here.
